# Supplementary material for: Atorvastatin calcium loaded PCL nanoparticles: development, optimization, in vitro and in vivo assessments
Source: Royal Society of Chemistry journal article supplement (doi:10.1039/c5ra26674b), 2016-01-01
Supplement: c5ra26674b1.pdf [file c5ra26674b1.pdf]

Appendix A. Supplementary information

**Atorvastatin calcium loaded PCL nanoparticles: development,  
optimization, in-vitro and in-vivo assessments**

Nagendra Kumar, Sundeep Chaurasia, Ravi R. Patel, Gayasuddin Khan, Vikas Kumar,  
Brahmeshwar Mishra\*

*Department of Pharmaceutics, Indian Institute of Technology (Banaras Hindu University),  
Varanasi-221005*

\*Address for correspondence:

Prof. B. Mishra,

Professor,

Department of Pharmaceutics,

IIT (BHU), Varanasi-221005.

Email ID: [bmishrabhu@rediffmail.com](mailto:bmishrabhu@rediffmail.com)

Telephone no.: 91(0542) 6702748,

Fax no. : 91(0542) 2368428

2368160

Table S1 Different release kinetic model of ALPNs release study

| Release kinetic model of ALPNs |                      |                |                                   |                |                                      |                |                 |       |                      |                                                     |
|--------------------------------|----------------------|----------------|-----------------------------------|----------------|--------------------------------------|----------------|-----------------|-------|----------------------|-----------------------------------------------------|
| Zero order                     |                      | First order    |                                   | Higuchi model  |                                      | KP model       |                 |       | Hixson-Crowell model |                                                     |
| R <sup>2</sup>                 | K <sub>0</sub> (%/h) | R <sup>2</sup> | K <sub>1</sub> (h <sup>-1</sup> ) | R <sup>2</sup> | K <sub>H</sub> (%h <sup>-1/2</sup> ) | R <sup>2</sup> | K <sub>kp</sub> | n     | R <sup>2</sup>       | K <sub>HC</sub> (% <sup>1/3</sup> h <sup>-1</sup> ) |
| 0.844                          | 0.801                | 0.807          | 0.005                             | 0.966          | 8.573                                | 0.987          | 26.99           | 0.269 | 0.967                | 0.026                                               |

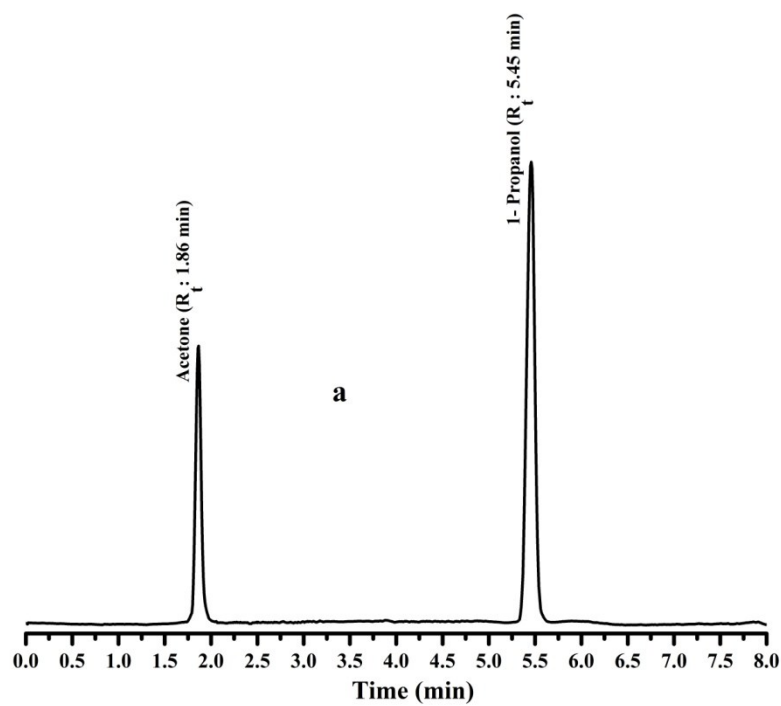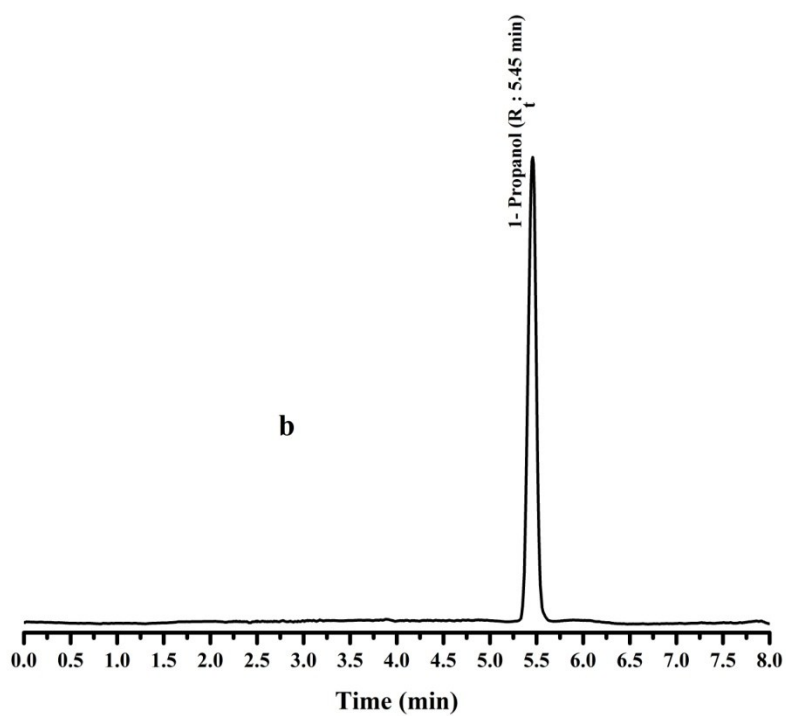

Fig. S1 Gas chromatogram of (a) standard acetone (1000 ppm) and internal standard 1-propanol (1500 ppm) in deionised water (b) aqueous sample of ALPNs with internal standard 1-propanol (1500 ppm)

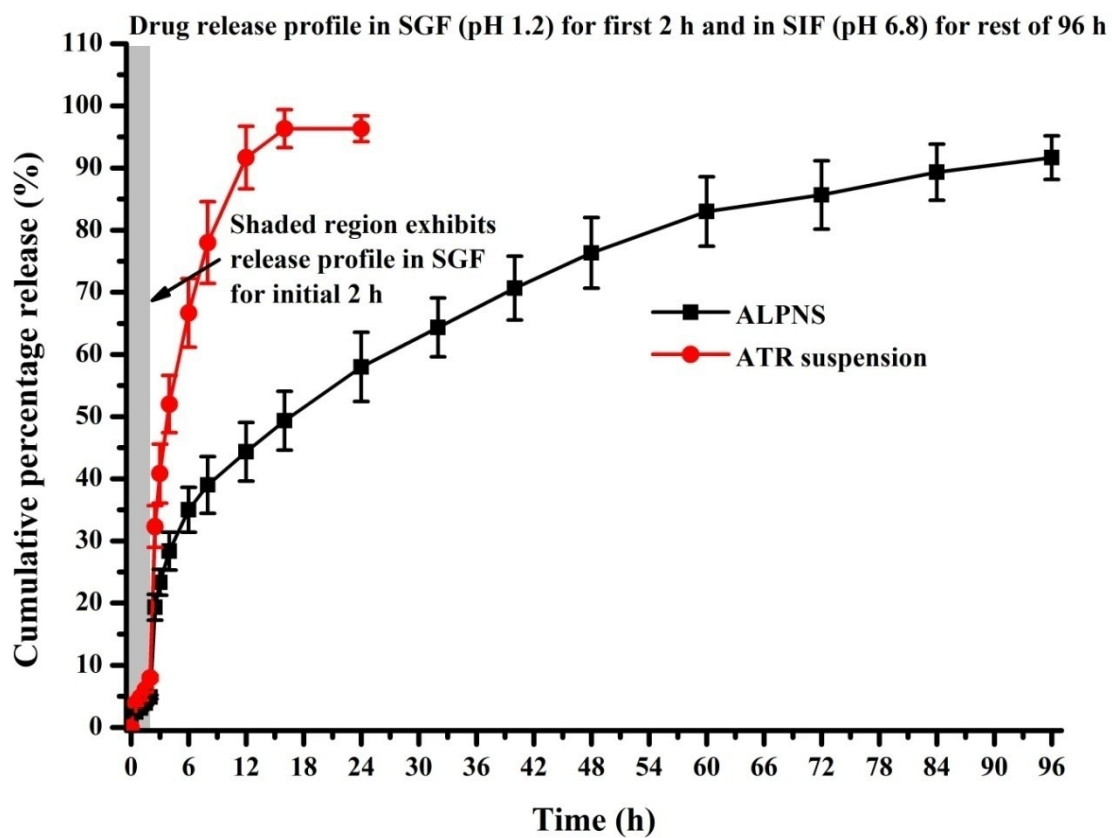

**Fig. S2** Depicting the *in vitro* atorvastatin release profile of ALPNS and pure ATR suspension in simulated gastric fluid (pH 1.2) for first 2 h and in simulated intestinal fluid (pH 6.8) for rest of 96 h, subsequently.
